# Supplementary material
Source: PubMed Central journal article supplement (PMC10106433)

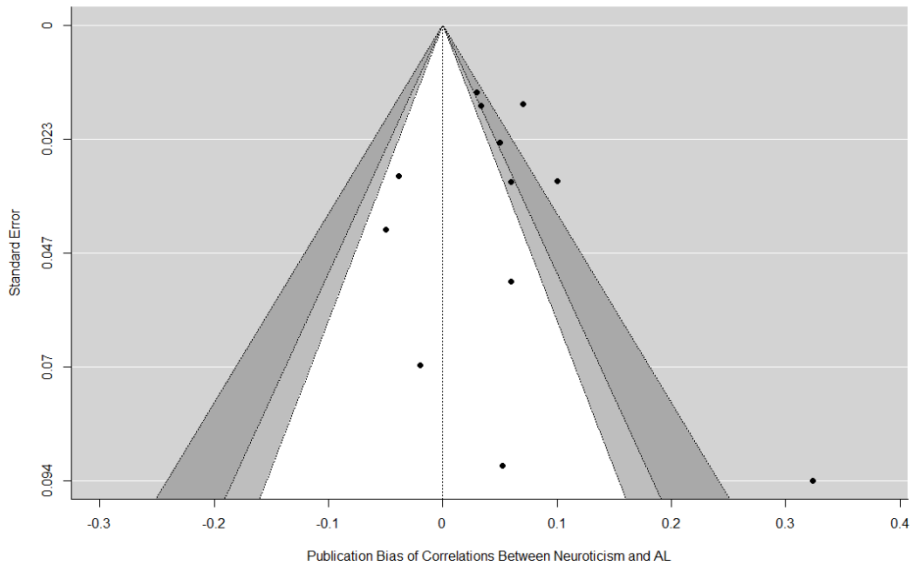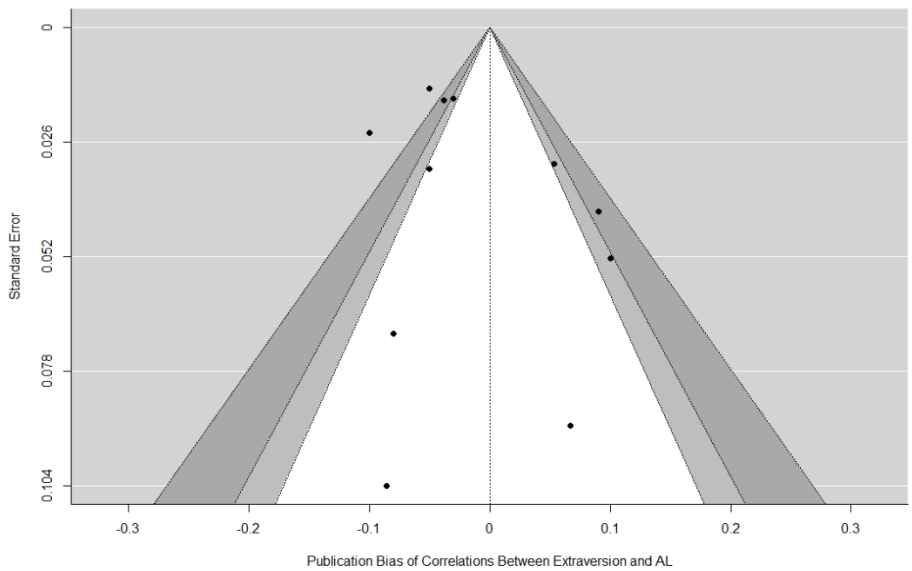

Supplement: NIHMS1889377-supplement-3.pdf [file NIHMS1889377-supplement-3.pdf]
